# Supplementary material for: Wild mushrooms as potential reservoirs of plant pathogenic bacteria: a case study on Burkholderia gladioli
Source: PubMed Central journal article supplement (PMC10986547; doi:10.1128/spectrum.03395-23), 2024-02-21
Supplement: spectrum.03395-23-s0001.pdf [file spectrum.03395-23-s0001.pdf]

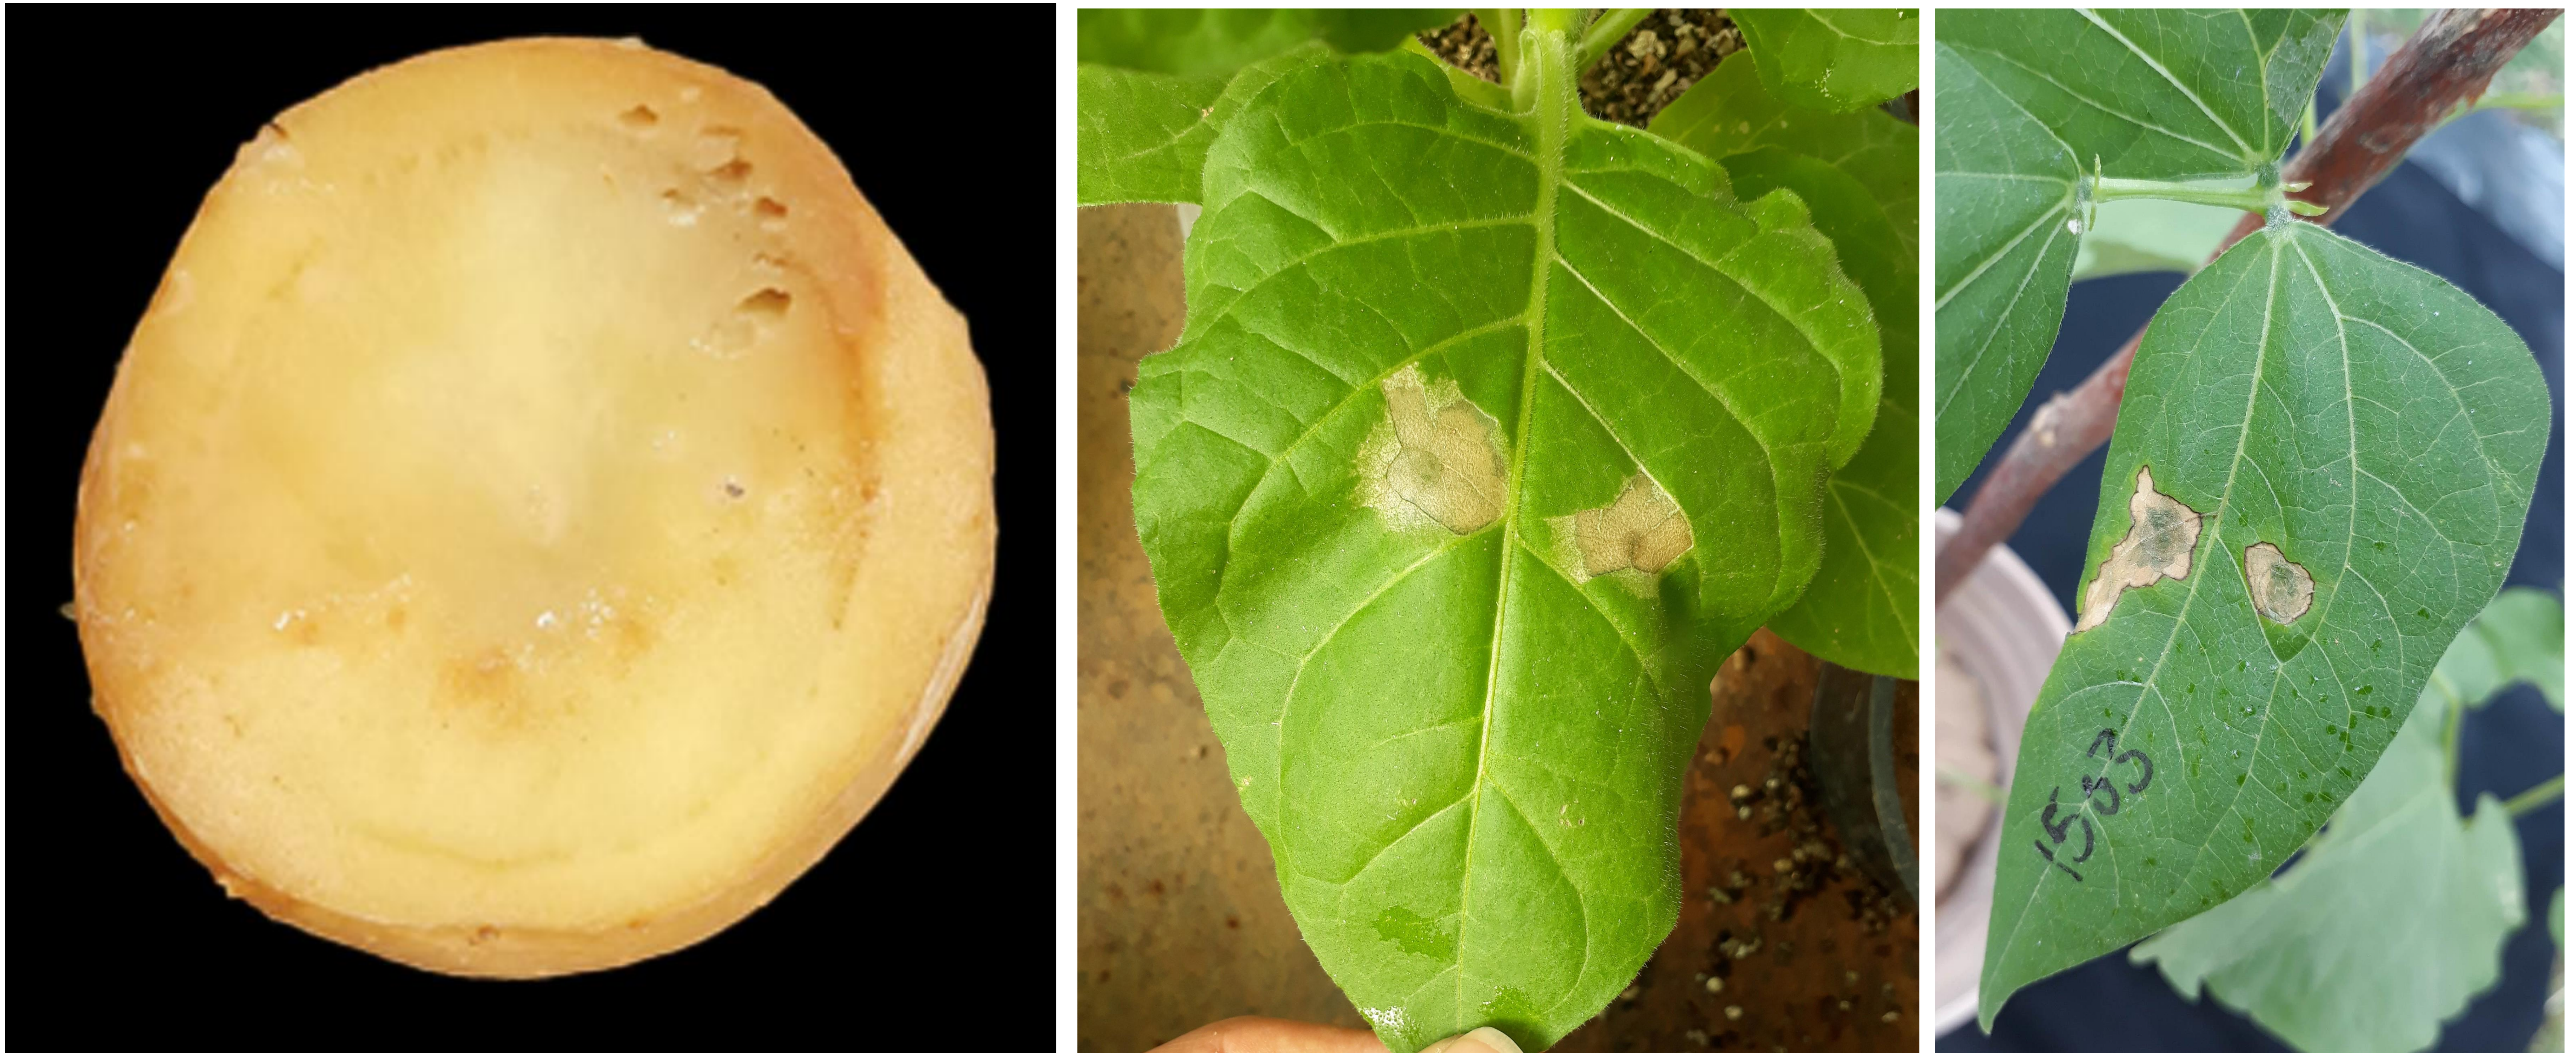

**Figure S1:** Pectinolytic activity of the strain IR1503 on potato disk (A), and hypersensitive reaction of the same strain on tobacco (B) and common bean (C) leaves.

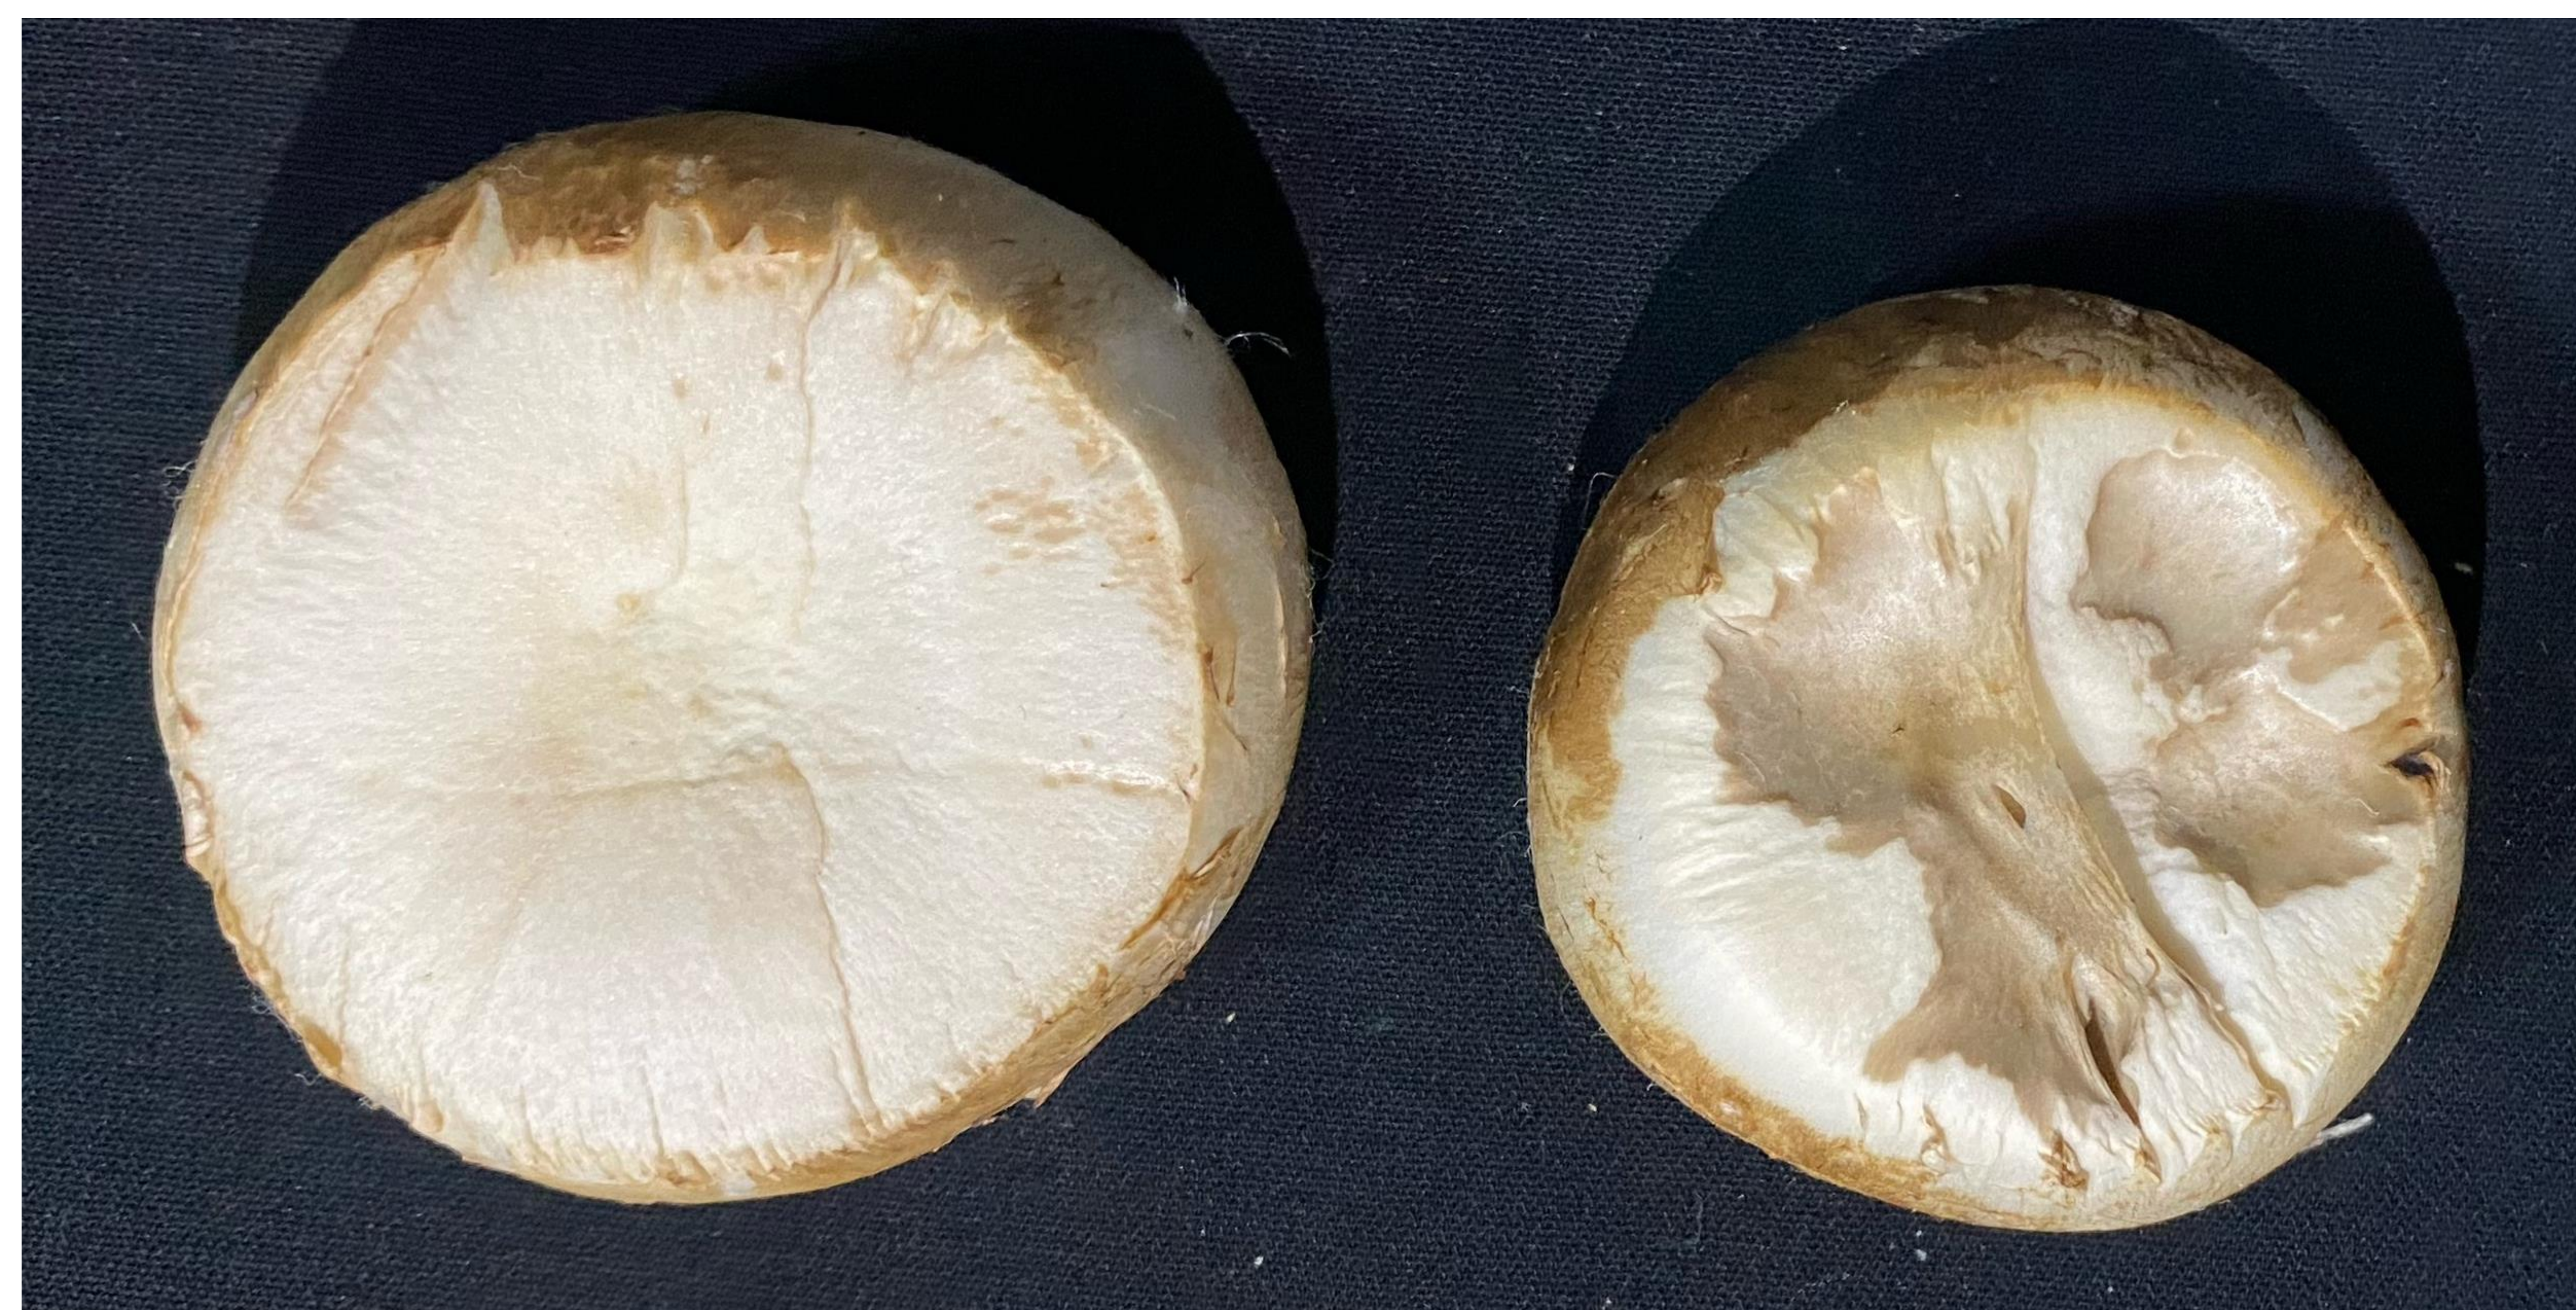

**Figure S2:** Inoculation of mushroom caps with non-pathogenic strain of *Escherichia coli* dh5α (left) and brown blotch pathogen of mushrooms *Pseudomonas tolaasii* CFBP 8707 (right). While brown blotch symptoms were observed on the mushroom caps inoculated with *Pseudomonas tolaasii* CFBP 8707 (positive control), the caps inoculated *E. coli* remained symptomless until 72 hours post inoculation.



**Ir1503**

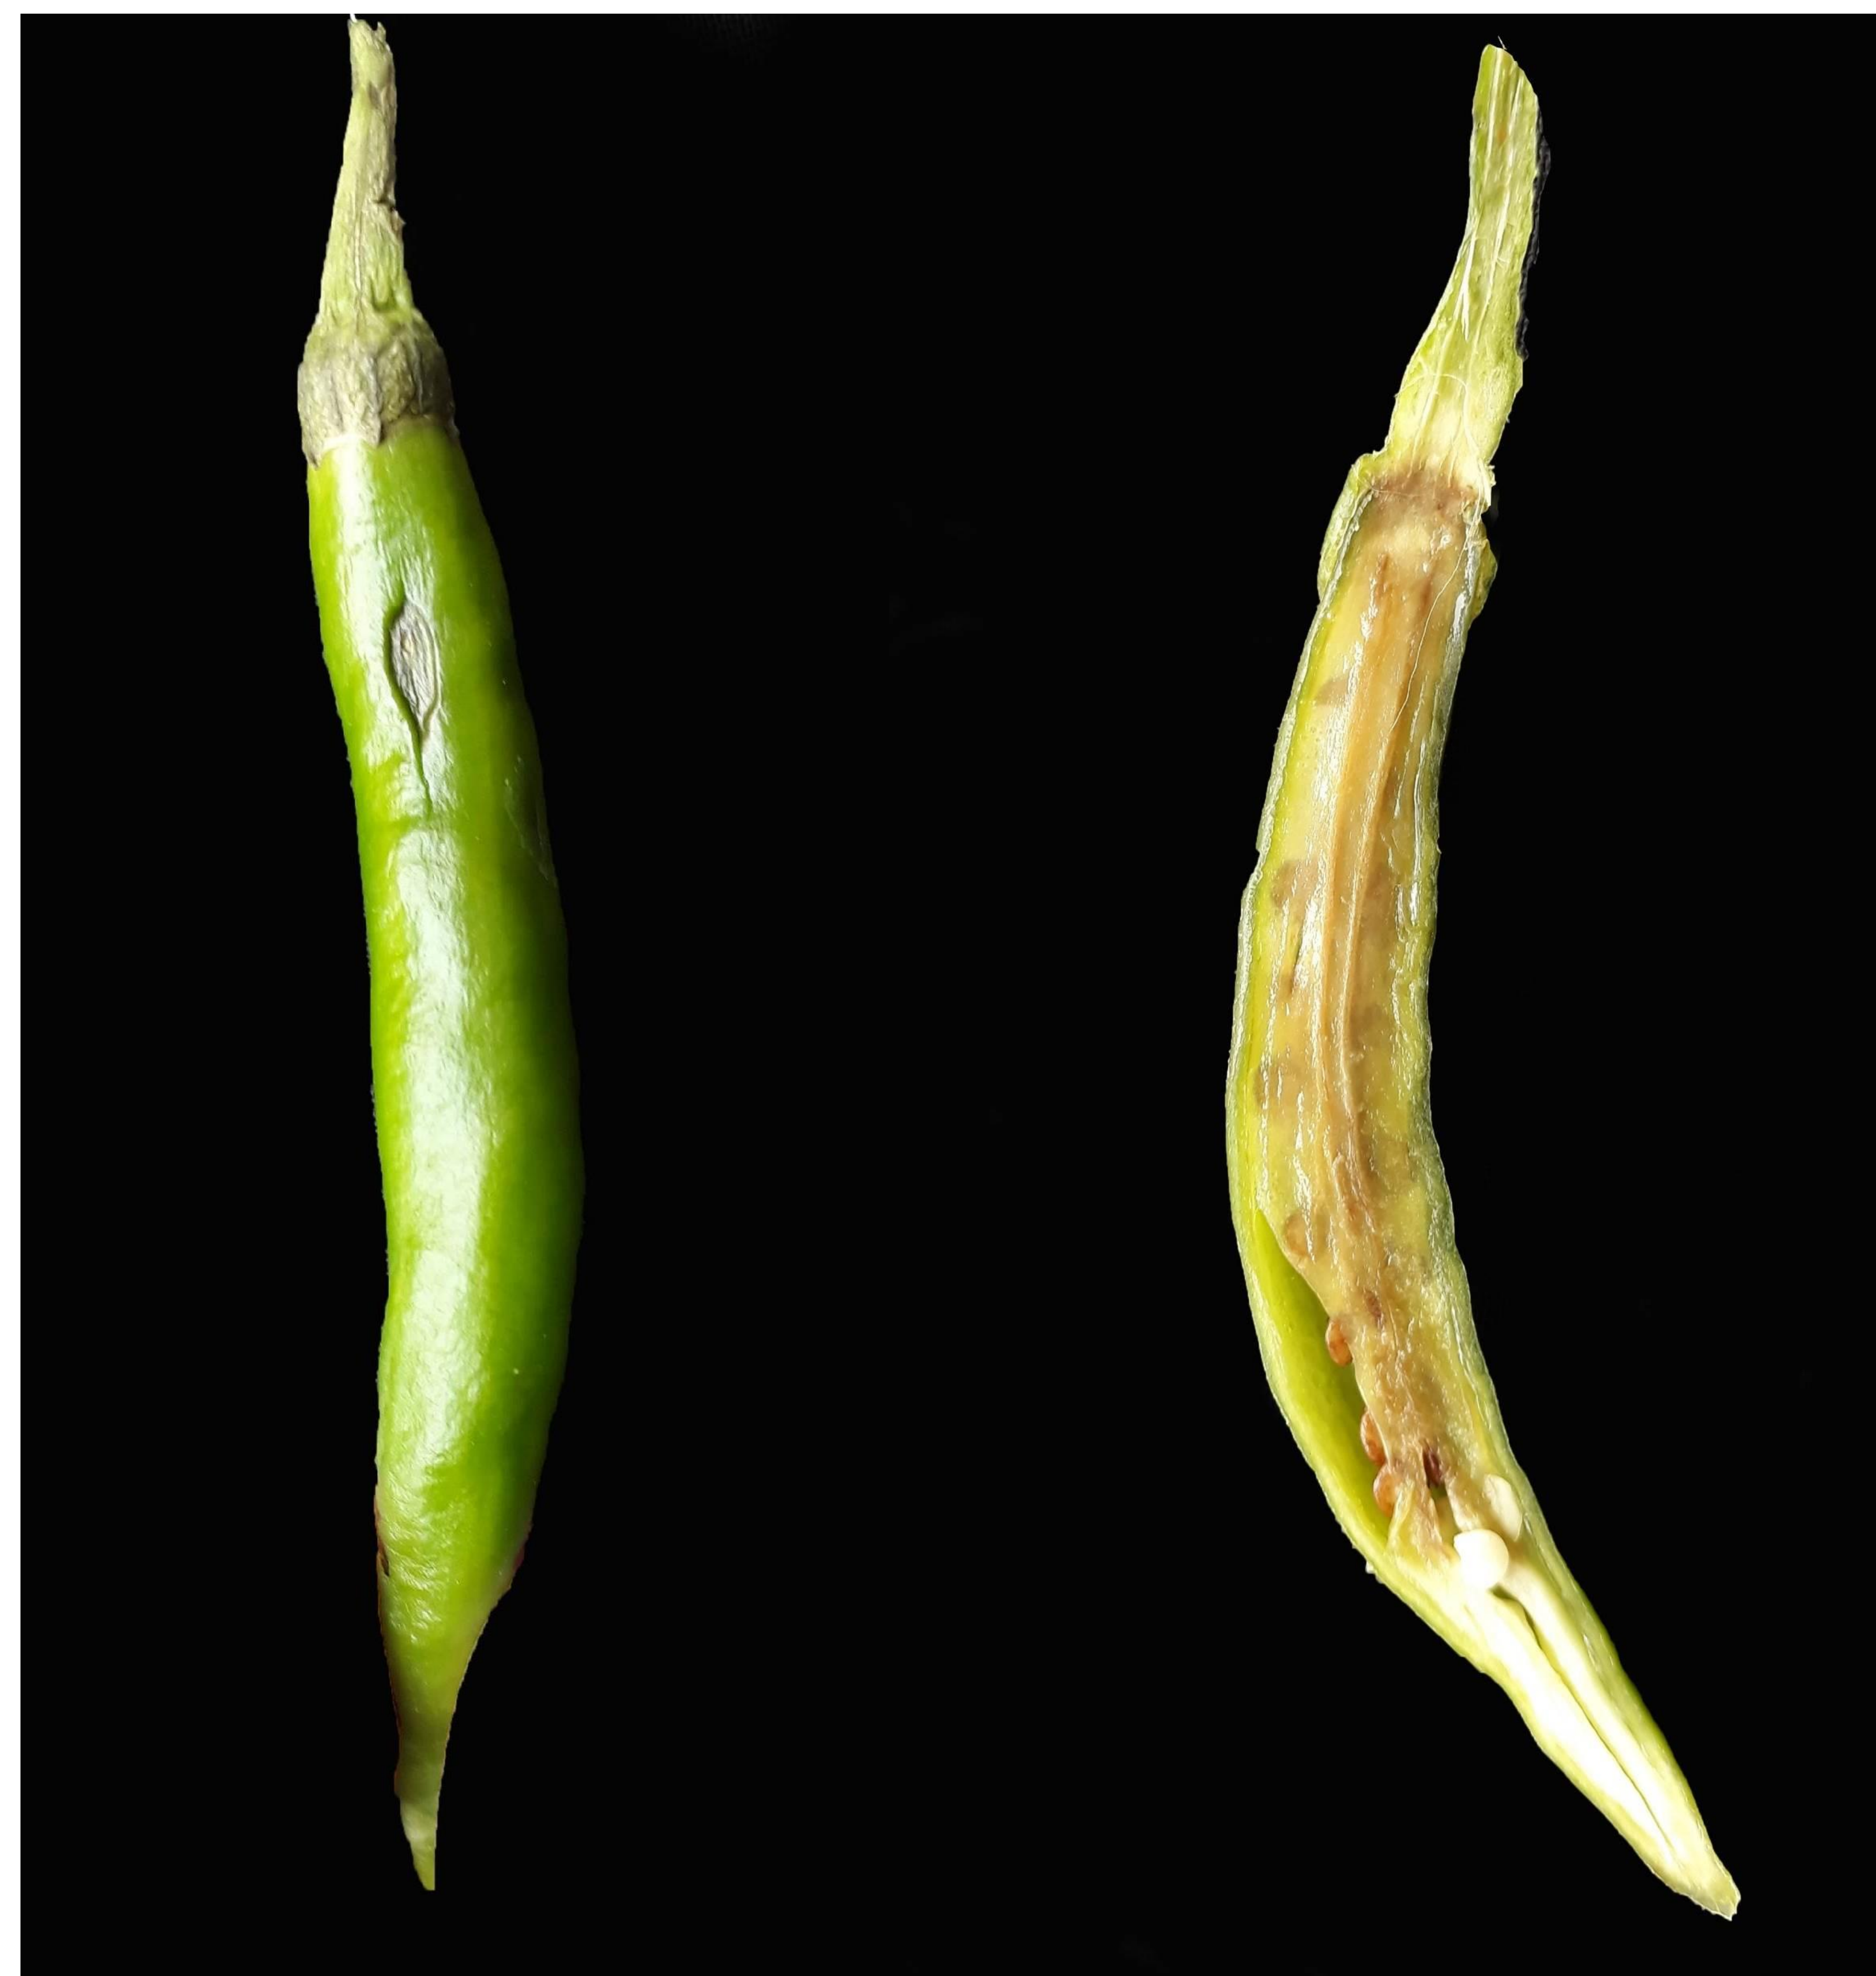

**Ir1504**

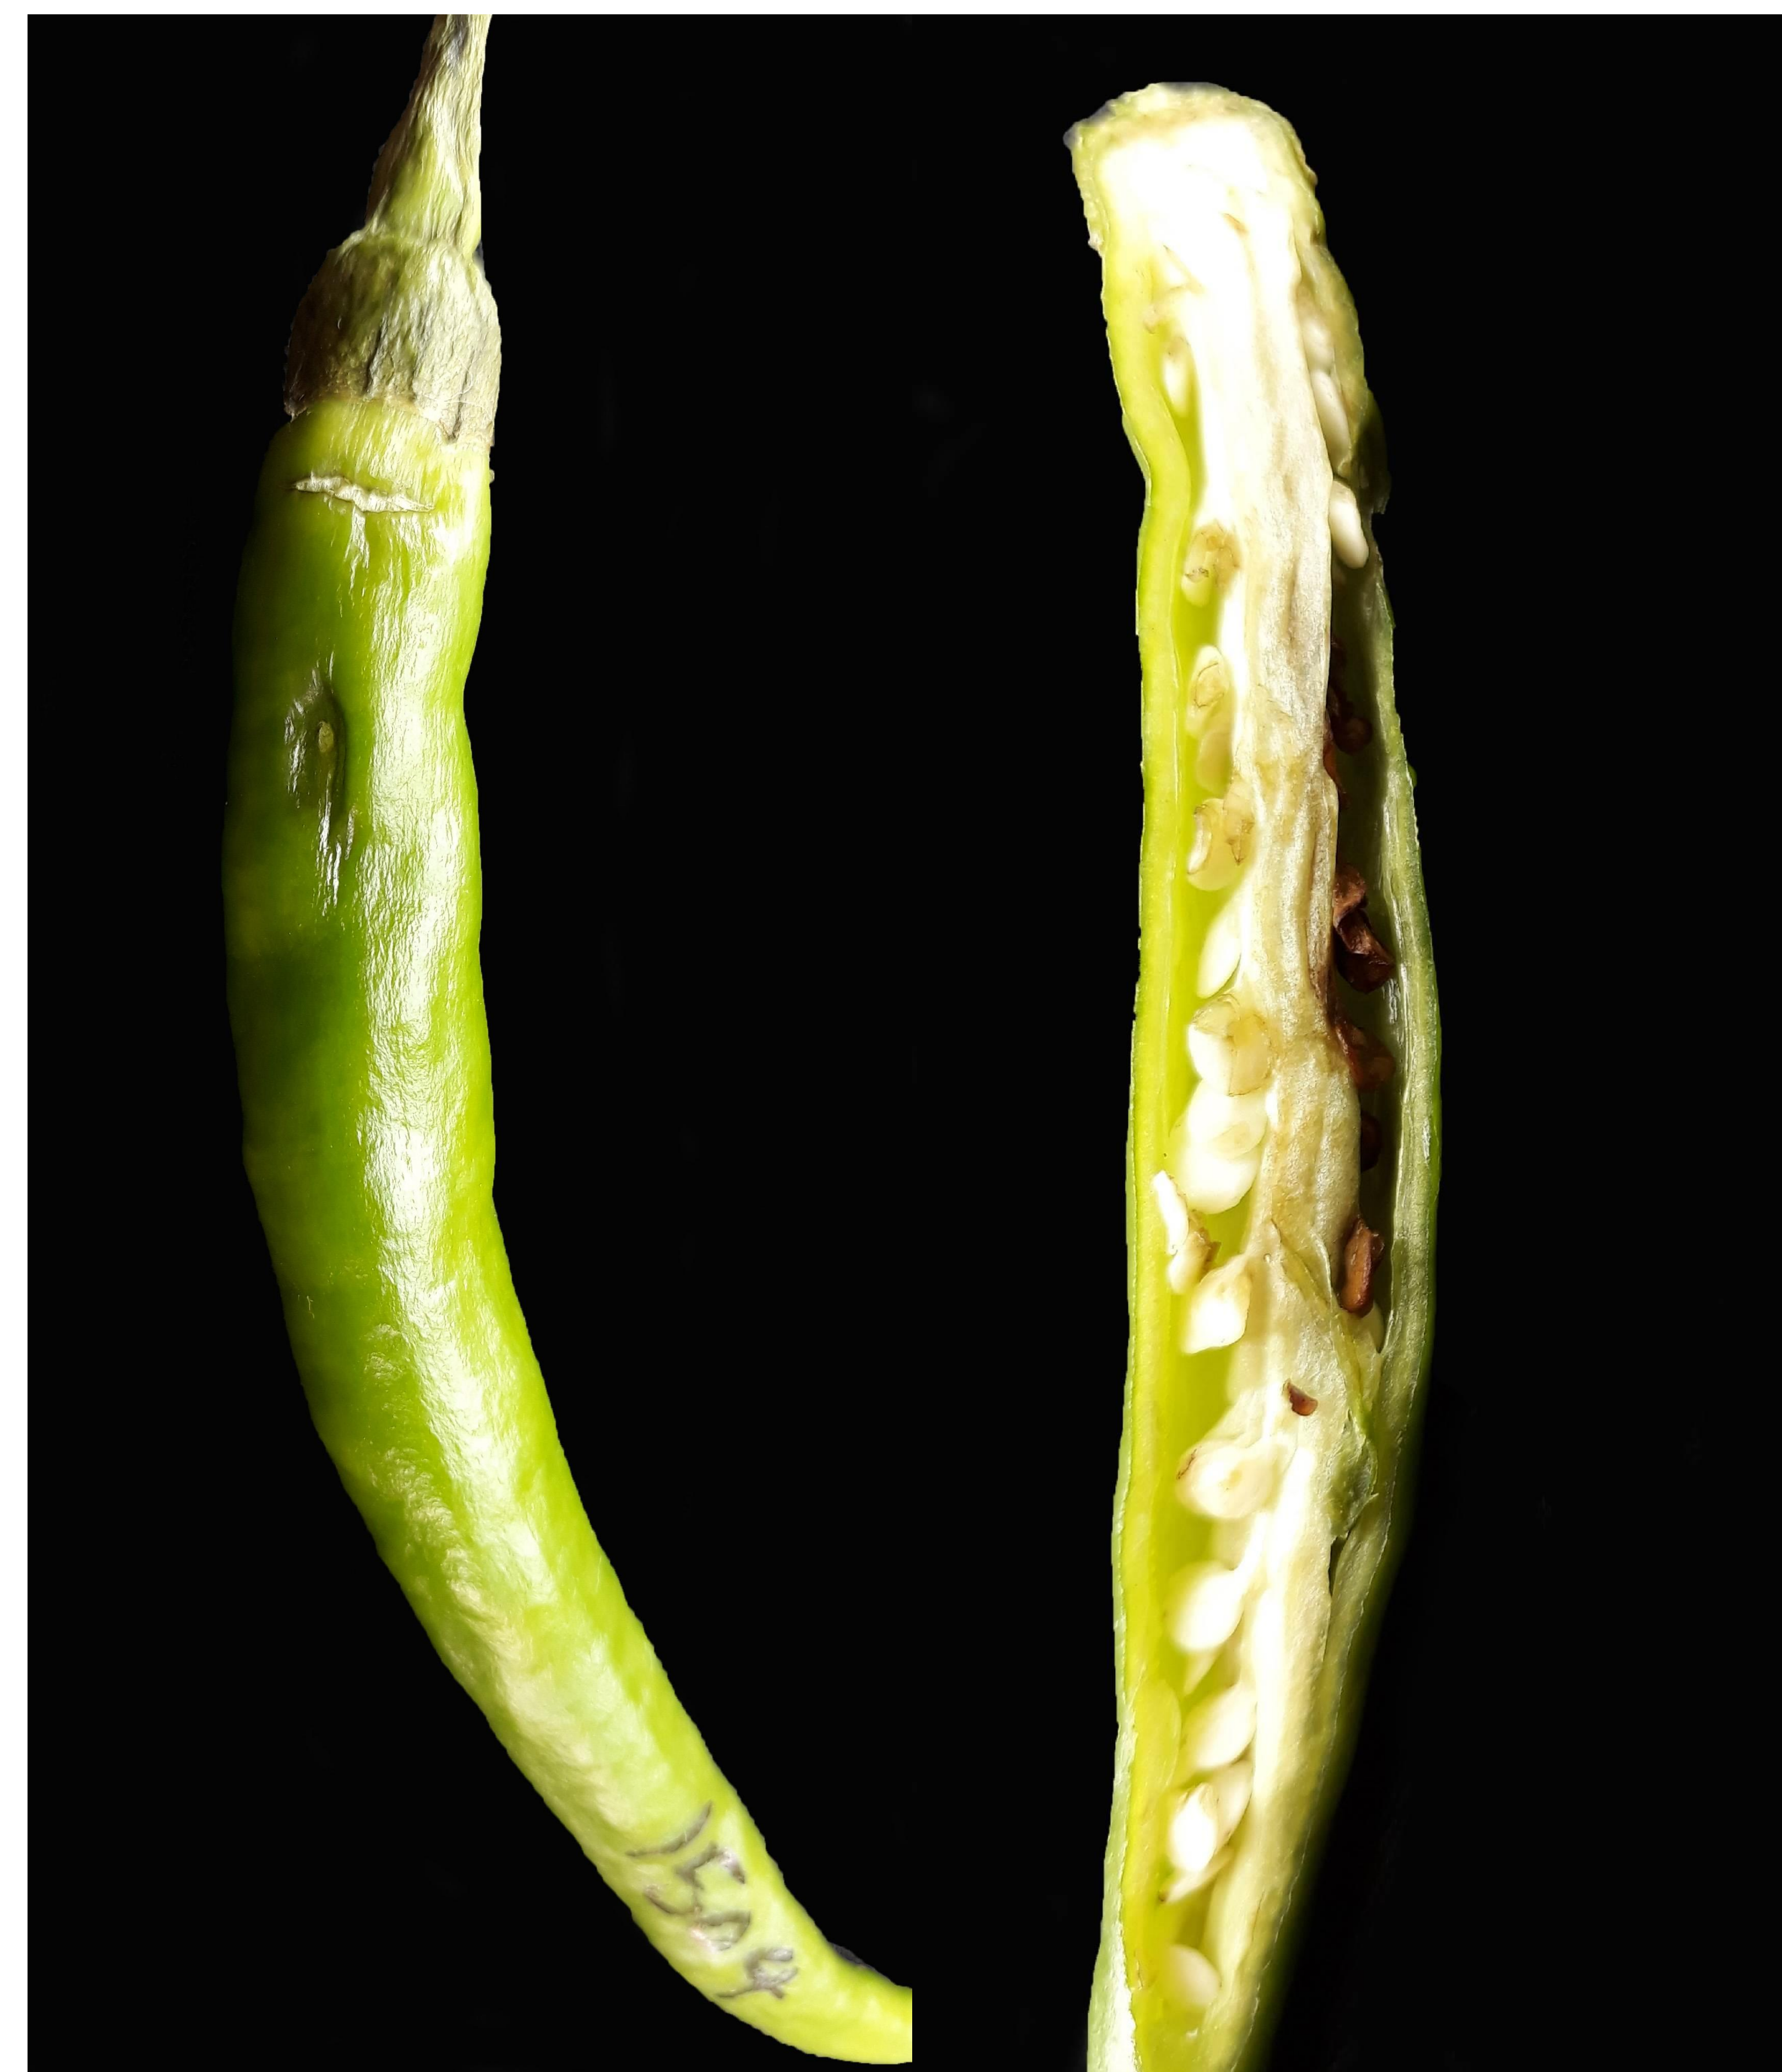

**Figure S3:** Pathogenicity of *Burkholderia gladioli* strains Ir1503 and Ir1504 on chili pepper.
